# Supplementary material
Source: ML conference proceedings conference paper supplement (https://openaccess.thecvf.com/content/WACV2024/html/Bernal_NOMAD_A_Natural_WACV_2024_paper.html)
Supplement: Supplementary file 1 [file Bernal_NOMAD_A_Natural_WACV_2024_supplemental.pdf]

## A. Supplemental tables

| Category      | Descriptor          | Values                                                                                                                                                                                                                                                               |
|---------------|---------------------|----------------------------------------------------------------------------------------------------------------------------------------------------------------------------------------------------------------------------------------------------------------------|
| Demographic   | Age                 | Years integer.                                                                                                                                                                                                                                                       |
|               | Weight              | Pounds integer.                                                                                                                                                                                                                                                      |
|               | Height              | Inches integer.                                                                                                                                                                                                                                                      |
|               | Gender              | Male, Female                                                                                                                                                                                                                                                         |
|               | Race                | White Caucasian, Latino Hispanic, African Descent, Asian, South Asian, Middle Eastern, Pacific Islander.                                                                                                                                                             |
|               | Clothes             | Including no more than three dominant clothes, described by its relative location to the body (Upper, Lower, Both), its color (see color list), a pattern (Horizontal Stripes, Vertical Stripes, Both, Plain, Random), and a figure.                                 |
|               | Hat                 | Any form of head covering, described by color.                                                                                                                                                                                                                       |
|               | Gloves              | Described by color.                                                                                                                                                                                                                                                  |
|               | Shoes               | Described by color and type. Types are categorized in 6 classes, by their coverage and formality: Bare, Open Informal ( <i>e.g.</i> sandals), Open Formal ( <i>e.g.</i> heels), Close Informal ( <i>e.g.</i> tennis), Close Formal ( <i>e.g.</i> Oxford), and Boots. |
|               | Facial Hair<br>Hair | Mustache, Beard.<br>Described by color and length (Bald, Short, Medium, Long).                                                                                                                                                                                       |
| Environmental | Date                | MM:DD format.                                                                                                                                                                                                                                                        |
|               | Time                | Integer, in 24hr format.                                                                                                                                                                                                                                             |
|               | Location            | Lake, Forest, Field, Golf Course, Quarry, Farm, School, School (Nature), Paintball.                                                                                                                                                                                  |
|               | Weather             | Temperature in Fahrenheit, wind speed in MPH, and a word descriptor ( <i>e.g.</i> "Sunny").                                                                                                                                                                          |
|               | Video               | 5.4k video resolution, 30 fps, 5472 by 3078 pixels' frames, and focal length of 8 mm.                                                                                                                                                                                |
|               | EV                  | String of 6 values, in increasing order of altitude and starting from the reference.                                                                                                                                                                                 |

Table 1. Metadata information attached to every actor. Demographic category includes all descriptors that could aid in identification tasks, including outfit description.

| Descriptors                         | Colors                                                                                                                                                      |
|-------------------------------------|-------------------------------------------------------------------------------------------------------------------------------------------------------------|
| Clothes, Hat, Gloves, Shoes<br>Hair | Red, Orange, Yellow, Green, Cyan, Blue, Purple, Pink, White, Gray, Black, Brown.<br>Black, Blond, Sandy, Brown, Gray, White, Red, Green, Blue, Pink, Other. |

Table 2. List of colors associated to different metadata descriptors.

| Distance | GSD [mm/pixel] | Face area [pixels] |
|----------|----------------|--------------------|
| 10       | 4.242          | 1981               |
| 30       | 12.729         | 220                |
| 50       | 21.213         | 79                 |
| 70       | 29.697         | 40                 |
| 90       | 38.184         | 24                 |

Table 3. Ground Sampling Distance (GSD) values at camera optical axis position, as well as the amount of pixels to cover the area of a person's face assuming a rectangle area of 155mm by 230mm.
